# Supplementary material for: A simple optogenetic MAPK inhibitor design reveals resonance between transcription-regulating circuitry and temporally-encoded inputs
Source: PubMed Central journal article supplement (PMC5437309; doi:10.1038/ncomms15017), 2017-05-12
Supplement: ncomms15017-s1.pdf [file ncomms15017-s1.pdf]

## Supplementary Figure 1: Amino acid sequences of AsLOV2J $\alpha$ and fusions with JIP used with Clustal Omega<sup>1</sup> alignment.

```
>AsLOV2J $\alpha$ 
LATTLERIEKNFVITDPRLPDNPIIFASDSFLQLTEYSREEILGRNCRFLQGPETDRATVRKIRDAIDNQLTEVTVQLINYTEKSGKKFWNLFHLQ
PMRDQKGDVQYFIGVQLDGTGTEHVRDAAEREGVMLIKKTAENIDEAAKEL*

>AsLOV2J $\alpha$ -JIP11 = "OptoJNKi"
LATTLERIEKNFVITDPRLPDNPIIFASDSFLQLTEYSREEILGRNCRFLQGPETDRATVRKIRDAIDNQLTEVTVQLINYTEKSGKKFWNLFHLQ
PMRDQKGDVQYFIGVQLDGTGTEHVRDAAEREGVMLIKKTAENIDEAAKELSRPKRPTTLNLF*

>AsLOV2J $\alpha$ -JIP11.dsm (C450A)
LATTLERIEKNFVITDPRLPDNPIIFASDSFLQLTEYSREEILGRNARFLQGPETDRATVRKIRDAIDNQLTEVTVQLINYTEKSGKKFWNLFHLQ
PMRDQKGDVQYFIGVQLDGTGTEHVRDAAEREGVMLIKKTAENIDEAAKELSRPKRPTTLNLF*

>AsLOV2J $\alpha$ -JIP11.lsm (I539E)
LATTLERIEKNFVITDPRLPDNPIIFASDSFLQLTEYSREEILGRNCRFLQGPETDRATVRKIRDAIDNQLTEVTVQLINYTEKSGKKFWNLFHLQ
PMRDQKGDVQYFIGVQLDGTGTEHVRDAAEREGVMLIKKTAENIDEAAKELSRPKRPTTLNLF*

>AsLOV2J $\alpha$ F509R-JIP11.dsm (C450A)
LATTLERIEKNFVITDPRLPDNPIIFASDSFLQLTEYSREEILGRNARFLQGPETDRATVRKIRDAIDNQLTEVTVQLINYTEKSGKKFWNLFHLQ
PMRDQKGDVQYRIGVQLDGTGTEHVRDAAEREGVMLIKKTAENIDEAAKELSRPKRPTTLNLF*

>AsLOV2J $\alpha$ F509R-JIP11.lsm (I539E)
LATTLERIEKNFVITDPRLPDNPIIFASDSFLQLTEYSREEILGRNCRFLQGPETDRATVRKIRDAIDNQLTEVTVQLINYTEKSGKKFWNLFHLQ
PMRDQKGDVQYRIGVQLDGTGTEHVRDAAEREGVMLIKKTAENIDEAAKELSRPKRPTTLNLF*

>AsLOV2J $\alpha$ -JIP10.dsm (C450A)
LATTLERIEKNFVITDPRLPDNPIIFASDSFLQLTEYSREEILGRNARFLQGPETDRATVRKIRDAIDNQLTEVTVQLINYTEKSGKKFWNLFHLQ
PMRDQKGDVQYFIGVQLDGTGTEHVRDAAEREGVMLIKKTAENIDEAAKELSRPKRPTTLNLF*

>AsLOV2J $\alpha$ -JIP10.lsm (I539E)
LATTLERIEKNFVITDPRLPDNPIIFASDSFLQLTEYSREEILGRNCRFLQGPETDRATVRKIRDAIDNQLTEVTVQLINYTEKSGKKFWNLFHLQ
PMRDQKGDVQYFIGVQLDGTGTEHVRDAAEREGVMLIKKTAENIDEAAKELSRPKRPTTLNLF*

>AsLOV2J $\alpha$ -JIP12.dsm (C450A)
LATTLERIEKNFVITDPRLPDNPIIFASDSFLQLTEYSREEILGRNARFLQGPETDRATVRKIRDAIDNQLTEVTVQLINYTEKSGKKFWNLFHLQ
PMRDQKGDVQYFIGVQLDGTGTEHVRDAAEREGVMLIKKTAENIDEAAKELSRPKRPTTLNLF*

>AsLOV2J $\alpha$ -JIP12.lsm (I539E)
LATTLERIEKNFVITDPRLPDNPIIFASDSFLQLTEYSREEILGRNCRFLQGPETDRATVRKIRDAIDNQLTEVTVQLINYTEKSGKKFWNLFHLQ
PMRDQKGDVQYFIGVQLDGTGTEHVRDAAEREGVMLIKKTAENIDEAAKELSRPKRPTTLNLF*

>AsLOV2J $\alpha$ -JIP13.dsm (C450A)
LATTLERIEKNFVITDPRLPDNPIIFASDSFLQLTEYSREEILGRNARFLQGPETDRATVRKIRDAIDNQLTEVTVQLINYTEKSGKKFWNLFHLQ
PMRDQKGDVQYFIGVQLDGTGTEHVRDAAEREGVMLIKKTAENIDEAAKELSRPKRPTTLNLF*

>AsLOV2J $\alpha$ -JIP13.lsm (I539E)
LATTLERIEKNFVITDPRLPDNPIIFASDSFLQLTEYSREEILGRNCRFLQGPETDRATVRKIRDAIDNQLTEVTVQLINYTEKSGKKFWNLFHLQ
PMRDQKGDVQYFIGVQLDGTGTEHVRDAAEREGVMLIKKTAENIDEAAKELSRPKRPTTLNLF*
```

CLUSTAL O(1.2.4) multiple sequence alignment

```
AsLOV2Jα          LATTLERIEKNFVITDPRLPDNPIIFASDSFLQLTEYSREEILGRNCRFLQGPETDRATV
AsLOV2Jα-JIP11    LATTLERIEKNFVITDPRLPDNPIIFASDSFLQLTEYSREEILGRNCRFLQGPETDRATV
AsLOV2Jα-JIP11.dsm(C450A) LATTLERIEKNFVITDPRLPDNPIIFASDSFLQLTEYSREEILGRNCRFLQGPETDRATV
AsLOV2Jα-JIP11.lsm(I539E) LATTLERIEKNFVITDPRLPDNPIIFASDSFLQLTEYSREEILGRNCRFLQGPETDRATV
AsLOV2JαF509R-JIP11.dsm(C450A) LATTLERIEKNFVITDPRLPDNPIIFASDSFLQLTEYSREEILGRNCRFLQGPETDRATV
AsLOV2JαF509R-JIP11.lsm(I539E) LATTLERIEKNFVITDPRLPDNPIIFASDSFLQLTEYSREEILGRNCRFLQGPETDRATV
AsLOV2Jα-JIP10.dsm(C450A) LATTLERIEKNFVITDPRLPDNPIIFASDSFLQLTEYSREEILGRNCRFLQGPETDRATV
AsLOV2Jα-JIP10.lsm(I539E) LATTLERIEKNFVITDPRLPDNPIIFASDSFLQLTEYSREEILGRNCRFLQGPETDRATV
AsLOV2Jα-JIP12.dsm(C450A) LATTLERIEKNFVITDPRLPDNPIIFASDSFLQLTEYSREEILGRNCRFLQGPETDRATV
AsLOV2Jα-JIP12.lsm(I539E) LATTLERIEKNFVITDPRLPDNPIIFASDSFLQLTEYSREEILGRNCRFLQGPETDRATV
AsLOV2Jα-JIP13.dsm(C450A) LATTLERIEKNFVITDPRLPDNPIIFASDSFLQLTEYSREEILGRNCRFLQGPETDRATV
AsLOV2Jα-JIP13.lsm(I539E) LATTLERIEKNFVITDPRLPDNPIIFASDSFLQLTEYSREEILGRNCRFLQGPETDRATV
*****

AsLOV2Jα          RKIRDAIDNQTEVTVQLINITYTKSGKKFWNLFHLQPMRDQKGDVQYFIGVQLDGTGTEHRDA
AsLOV2Jα-JIP11    RKIRDAIDNQTEVTVQLINITYTKSGKKFWNLFHLQPMRDQKGDVQYFIGVQLDGTGTEHRDA
AsLOV2Jα-JIP11.dsm(C450A) RKIRDAIDNQTEVTVQLINITYTKSGKKFWNLFHLQPMRDQKGDVQYFIGVQLDGTGTEHRDA
AsLOV2Jα-JIP11.lsm(I539E) RKIRDAIDNQTEVTVQLINITYTKSGKKFWNLFHLQPMRDQKGDVQYFIGVQLDGTGTEHRDA
AsLOV2JαF509R-JIP11.dsm(C450A) RKIRDAIDNQTEVTVQLINITYTKSGKKFWNLFHLQPMRDQKGDVQYRIGVQLDGTGTEHRDA
AsLOV2JαF509R-JIP11.lsm(I539E) RKIRDAIDNQTEVTVQLINITYTKSGKKFWNLFHLQPMRDQKGDVQYRIGVQLDGTGTEHRDA
AsLOV2Jα-JIP10.dsm(C450A) RKIRDAIDNQTEVTVQLINITYTKSGKKFWNLFHLQPMRDQKGDVQYFIGVQLDGTGTEHRDA
AsLOV2Jα-JIP10.lsm(I539E) RKIRDAIDNQTEVTVQLINITYTKSGKKFWNLFHLQPMRDQKGDVQYFIGVQLDGTGTEHRDA
AsLOV2Jα-JIP12.dsm(C450A) RKIRDAIDNQTEVTVQLINITYTKSGKKFWNLFHLQPMRDQKGDVQYFIGVQLDGTGTEHRDA
AsLOV2Jα-JIP12.lsm(I539E) RKIRDAIDNQTEVTVQLINITYTKSGKKFWNLFHLQPMRDQKGDVQYFIGVQLDGTGTEHRDA
AsLOV2Jα-JIP13.dsm(C450A) RKIRDAIDNQTEVTVQLINITYTKSGKKFWNLFHLQPMRDQKGDVQYFIGVQLDGTGTEHRDA
AsLOV2Jα-JIP13.lsm(I539E) RKIRDAIDNQTEVTVQLINITYTKSGKKFWNLFHLQPMRDQKGDVQYFIGVQLDGTGTEHRDA
*****

AsLOV2Jα          AREGVMLIKKTAENIDEAAKEL*-----
AsLOV2Jα-JIP11    AREGVMLIKKTAENIDEAAKELSRPKRPTTLNLF*--
AsLOV2Jα-JIP11.dsm(C450A) AREGVMLIKKTAENIDEAAKELSRPKRPTTLNLF*--
AsLOV2Jα-JIP11.lsm(I539E) AREGVMLIKKTAENEDEAAKELSRPKRPTTLNLF*--
AsLOV2JαF509R-JIP11.dsm(C450A) AREGVMLIKKTAENIDEAAKELSRPKRPTTLNLF*--
AsLOV2JαF509R-JIP11.lsm(I539E) AREGVMLIKKTAENEDEAAKELSRPKRPTTLNLF*--
AsLOV2Jα-JIP10.dsm(C450A) AREGVMLIKKTAENIDEAAKELSRPKRPTTLNLF*--
AsLOV2Jα-JIP10.lsm(I539E) AREGVMLIKKTAENEDEAAKELSRPKRPTTLNLF*--
AsLOV2Jα-JIP12.dsm(C450A) AREGVMLIKKTAENIDEAAKELSRPKRPTTLNLF*--
AsLOV2Jα-JIP12.lsm(I539E) AREGVMLIKKTAENEDEAAKELSRPKRPTTLNLF*--
AsLOV2Jα-JIP13.dsm(C450A) AREGVMLIKKTAENIDEAAKELSRPKRPTTLNLF*--
AsLOV2Jα-JIP13.lsm(I539E) AREGVMLIKKTAENEDEAAKELSRPKRPTTLNLF*--
*****
```

Supplementary Figure 2: Whole gel and film lengths for images in Fig. 2

A.

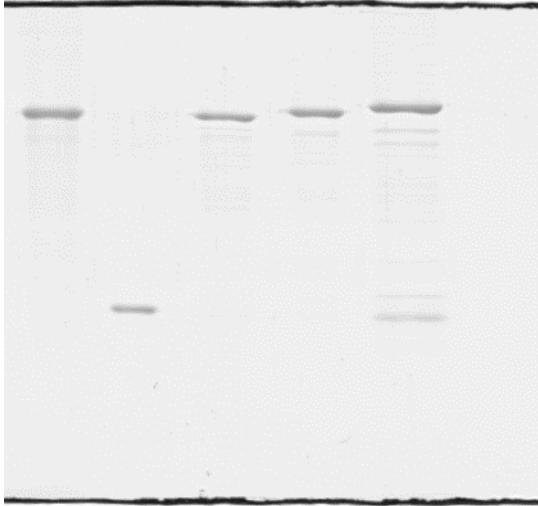

B.

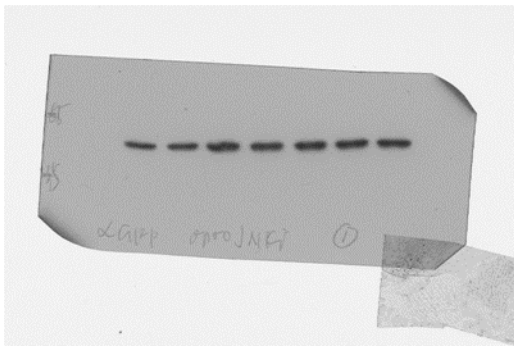

A. Whole length of gel shown corresponding to Fig. 2A

B. Whole film of blot corresponding to Fig. 2E

Supplementary Figure 3: Whole film lengths for images in Fig. 4  
A

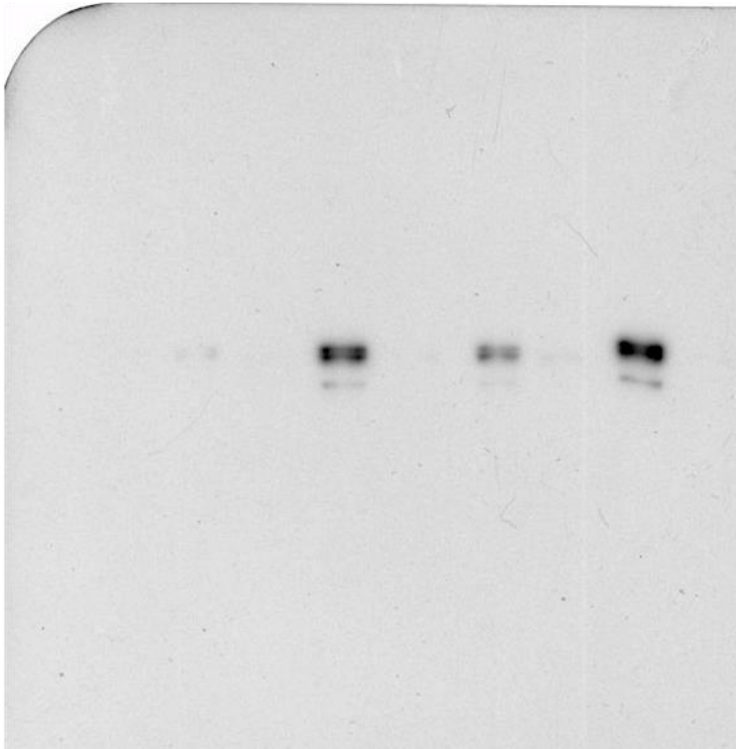

B.

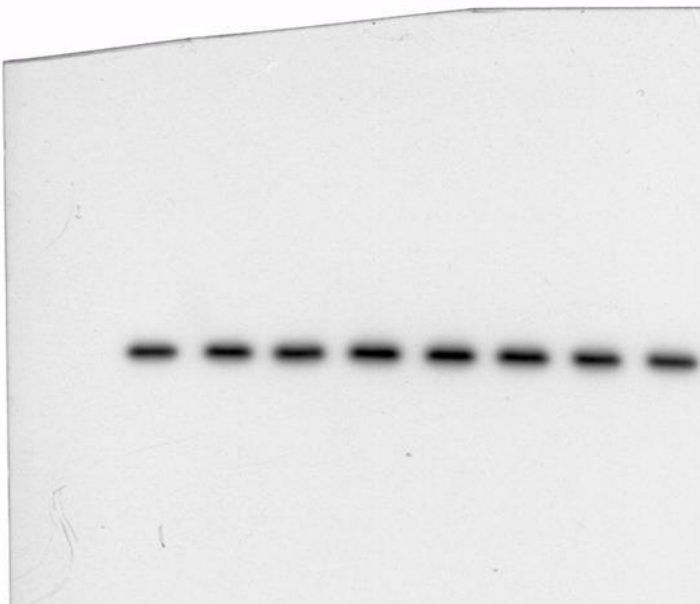

A. Film of whole length of blot shown in Fig. 5A (Phospho-Serine 73 c-Jun blot)  
B. Film of whole length of blot shown in Fig. 5B ( $\beta$ -actin blot)

Supplementary Figure 4: Whole length of gels and films for Fig. 10

A.

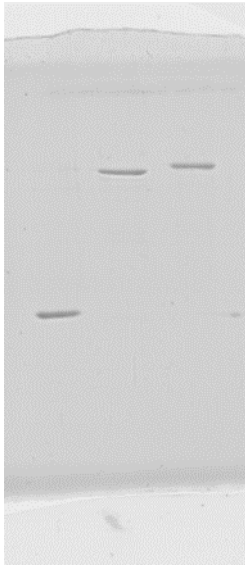

B.

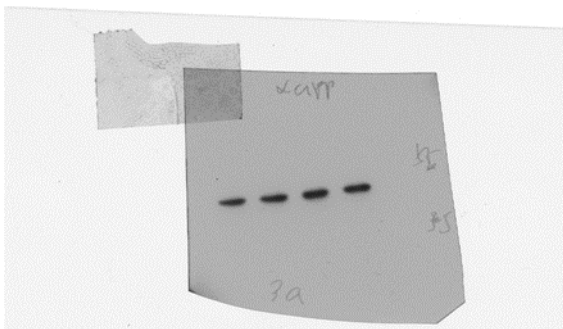

C.

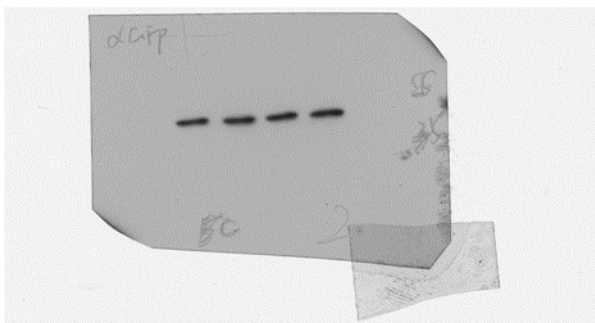

D.

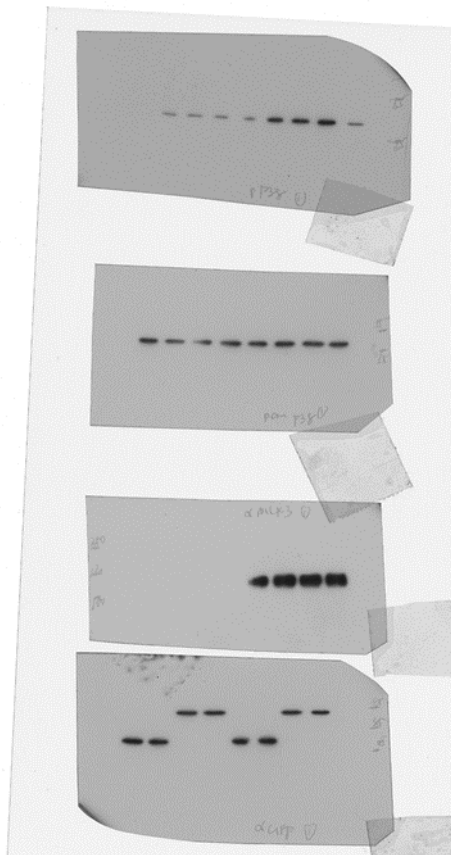

A. Whole length of gel corresponding to Fig. 10B. Lane 1 is GST, not shown in Fig. 10B.

B. Whole film corresponding to Fig. 10H, OptoJNKi3-13F.lsm

C. Whole film corresponding to Fig. 10H, OptoJNKi5-13F.dsm

D. Whole films corresponding to Fig. 10I, from top: phospho-p38, pan-p38, MLK3, GFP.



>Optop38i(5-13F).dsm  
LATTLERIEKNFVITDPRLPDNPIIFASDSFQLTEYSREEILGRNARFLQGPETDRATVRKIRDADIDNQTEVTVQLINITYKSGKKFWNLFHLQPMRDQKGDVQYFI  
GVQLDGTEHVRDAAEREGVMLIKKTAENIDEAAKELSRKKDLRISCMF\*

>Optop38i(5-13F).lsm  
LATTLERIEKNFVITDPRLPDNPIIFASDSFQLTEYSREEILGRNCRFLQGPETDRATVRKIRDADIDNQTEVTVQLINITYKSGKKFWNLFHLQPMRDQKGDVQYFI  
GVQLDGTEHVRDAAEREGVMLIKKTAENIDEAAKELSRKKDLRISCMF\*

>Optop38i(5-13L).dsm  
LATTLERIEKNFVITDPRLPDNPIIFASDSFQLTEYSREEILGRNARFLQGPETDRATVRKIRDADIDNQTEVTVQLINITYKSGKKFWNLFHLQPMRDQKGDVQYFI  
GVQLDGTEHVRDAAEREGVMLIKKTAENIDEAAKELSRKKDLRISCLM\*

>Optop38i(5-13L).lsm  
LATTLERIEKNFVITDPRLPDNPIIFASDSFQLTEYSREEILGRNCRFLQGPETDRATVRKIRDADIDNQTEVTVQLINITYKSGKKFWNLFHLQPMRDQKGDVQYFI  
GVQLDGTEHVRDAAEREGVMLIKKTAENIDEAAKELSRKKDLRISCLM\*

>Optop38i(5-13V).dsm  
LATTLERIEKNFVITDPRLPDNPIIFASDSFQLTEYSREEILGRNARFLQGPETDRATVRKIRDADIDNQTEVTVQLINITYKSGKKFWNLFHLQPMRDQKGDVQYFI  
GVQLDGTEHVRDAAEREGVMLIKKTAENIDEAAKELSRKKDLRISCMV\*

>Optop38i(5-13V).lsm  
LATTLERIEKNFVITDPRLPDNPIIFASDSFQLTEYSREEILGRNCRFLQGPETDRATVRKIRDADIDNQTEVTVQLINITYKSGKKFWNLFHLQPMRDQKGDVQYFI  
GVQLDGTEHVRDAAEREGVMLIKKTAENIDEAAKELSRKKDLRISCMV\*

>Optop38i3(3-13F)  
LATTLERIEKNFVITDPRLPDNPIIFASDSFQLTEYSREEILGRNCRFLQGPETDRATVRKIRDADIDNQTEVTVQLINITYKSGKKFWNLFHLQPMRDQKGDVQYFI  
GVQLDGTEHVRDAAEREGVMLIKKTAENIDEAAKELSRKKDLRISCMF\*





Supplementary Figure 6: List of plasmids used in this study (plasmids in bold presented here for the first time)

**pGEX-6P-hJNK1 $\alpha$ 1**  
**pGEX-6P-hJNK2 $\beta$ 1**  
**pGEX-6P-hJNK3 $\alpha$ 1**  
pGEX-6P1  
**pGEX-hp38 $\alpha$ tv2**  
**pET28a-His-TAT-LOV2J $\alpha$**   
**pET28a-His-TAT-OptoJNKi**  
**pmCherry-hMKK3b-EE**  
**pEBG-r $\Delta$ MEKK1(1174-1493)**  
pEGFP-hMLK3  
**pYpet-C1**  
pLuc-C1  
**pLuc-mERK2**  
**pLuc-hp38 $\alpha$ tv2**  
**pLuc-hJNK1 $\alpha$ 1**  
**pLuc-hJNK1 $\beta$ 1**  
**pLuc-hJNK2 $\alpha$ 2**  
**pLuc-hJNK3 $\alpha$ 1**  
**pLuc-hMKK3b**  
pCGN-GAL4-Mef2A  
pcDNA3-GAL4-c-Jun(5-105)  
pRL-CMV  
pGL3-G5E4 $\Delta$ 38  
pCMV  
pH2B-Venus  
pH2B-mCherry  
**pLifeact-Ypet**  
**pmKeima620-NES-JIP1-277**  
**pmKeima620-3xNLS-JIP1-277**  
**pLuc-JIP1-277**  
**pLuc-AsLOV2J $\alpha$ -JIP10.lsm**  
**pLuc-AsLOV2J $\alpha$ -JIP10.dsm**  
**pLuc-AsLOV2J $\alpha$ -JIP11.lsm (OptoJNKi.lsm)**  
**pLuc-AsLOV2J $\alpha$ -JIP11.dsm (OptoJNKi.dsm)**  
**pLuc-AsLOV2J $\alpha$ (F509R)-JIP11.lsm (OptoJNKi(F509R).lsm)**  
**pLuc-AsLOV2J $\alpha$ (F509R)-JIP11.dsm (OptoJNKi(F509R).dsm)**  
**pYpet-AsLOV2J $\alpha$ -JIP11.dsm (Ypet-OptoJNKi.lsm)**  
**pYpet-AsLOV2J $\alpha$ -JIP11.lsm (Ypet-OptoJNKi.dsm)**  
**pLuc-OptoJNKi**  
**pmCherry-NLS-OptoJNKi**  
**pmCherry-NLS-OptoJNKi.lsm**  
**pmCherry-NES-OptoJNKi**  
**pH2B-pmCherry-OptoJNKi**  
**pmCherry-NLS-OptoJNKi.dsm**  
**pLuc-AsLOV2J $\alpha$ -JIP12.lsm**  
**pLuc-AsLOV2J $\alpha$ -JIP12.dsm**  
**pLuc-AsLOV2J $\alpha$ -JIP13.lsm**  
**pLuc-AsLOV2J $\alpha$ -JIP13.dsm**  
**pLuc-Optop38i.1-13F.lsm**

pLuc-Optop38i.1-13F.dsm  
pLuc-Optop38i.1-10F.lsm  
pLuc-Optop38i.1-10F.dsm  
pLuc-Optop38i.1-13.lsm  
pLuc-Optop38i.1-13.dsm  
pLuc-Optop38i.2-13.lsm  
pLuc-Optop38i.2-13.dsm  
pLuc-Optop38i.2-13F.lsm  
pLuc-Optop38i.2-13F.dsm  
pLuc-Optop38i.3-13.lsm  
pLuc-Optop38i.3-13.dsm  
pLuc-Optop38i.3-13F.lsm  
pLuc-Optop38i.3-13F.dsm  
pYpet-Optop38i.3-13F.lsm  
pLuc-Optop38i3 (LOV2Jα.3-13F)  
pLuc-Optop38i.4-13.lsm  
pLuc-Optop38i.4-13.dsm  
pLuc-Optop38i.4-13F.lsm  
pLuc-Optop38i.4-13F.dsm  
pLuc-Optop38i.5-13.lsm  
pLuc-Optop38i.5-13.dsm  
pLuc-Optop38i.5-13F.lsm  
pLuc-Optop38i.5-13F.dsm  
pLuc-Optop38i.5-13L.lsm  
pLuc-Optop38i.5-13L.dsm  
pLuc-Optop38i.5-13V.lsm  
pLuc-Optop38i.5-13V.dsm  
pYpet-Optop38i.5-13F.dsm

### Supplementary References

1. Sievers F, Wilm A, Dineen DG, Gibson TJ, Karplus K, Li W, Lopez R, McWilliam H, Remmert M, Söding J, Thompson JD, Higgins D (2011) Fast, scalable generation of high-quality protein multiple sequence alignments using Clustal Omega Molecular Systems Biology (2011) 7, 539.
